# Supplementary material for: Bioceramic akermanite enhanced vascularization and osteogenic differentiation of human induced pluripotent stem cells in 3D scaffolds in vitro and vivo
Source: Royal Society of Chemistry journal article supplement (doi:10.1039/c9ra02026h), 2019-01-01
Supplement: c9ra02026h1.pdf [file c9ra02026h1.pdf]

**Table S1. The sequences of the primers used in qRT-PCR experiments.**

| Gene  | Forward primer            | Reverse primer            |
|-------|---------------------------|---------------------------|
| ALP   | 5'ACCACCACgAgAgTgAACCA    | 5'CgTTgTCTgAgTACCAgTCCC   |
| RUNX2 | 5'TggTACTgTCATggCgggTA    | 5'TCTCAgATCgTTgAACCTTgCTA |
| BMP2  | 5'TTCggCCTgAAACAgAgACC    | 5'CCTgAgTgCCTgCgATACAg    |
| COL1  | 5'gAgggCCAAGACgAAgACATC   | 5'CAgATCACgTCATCgCACAAC   |
| OCN   | 5'CACTCCTCgCCCTATTggC     | 5'CCCTCCTgCTTggACACAAAg   |
| BSP   | 5'AGAAAGAGCAGCACGGTTGAGT  | 5'GACCCTCGTAGCCTTCATAGCC  |
| VEGF  | 5'TGCGGATCAAACCTCACCA     | 5'CAGGGATTTTTCTTGCTTGCT   |
| CD31  | 5'GCTGTCTACTCAGTCATGGCC   | 5'CGTCTCTTCCTTCTGGATGGTG  |
| GAPDH | 5'-GATTTGGTCGTATTGGGCG-3' | 5'-CTGGAAGATGGTGATGG-3'   |
